# Supplementary material
Source: publisher site journal article supplement (https://www.dovepress.com/article/325056)
Supplement: Supplementary file 1 [file get_supplementary_file.php]

**SUPPLEMENT 1**


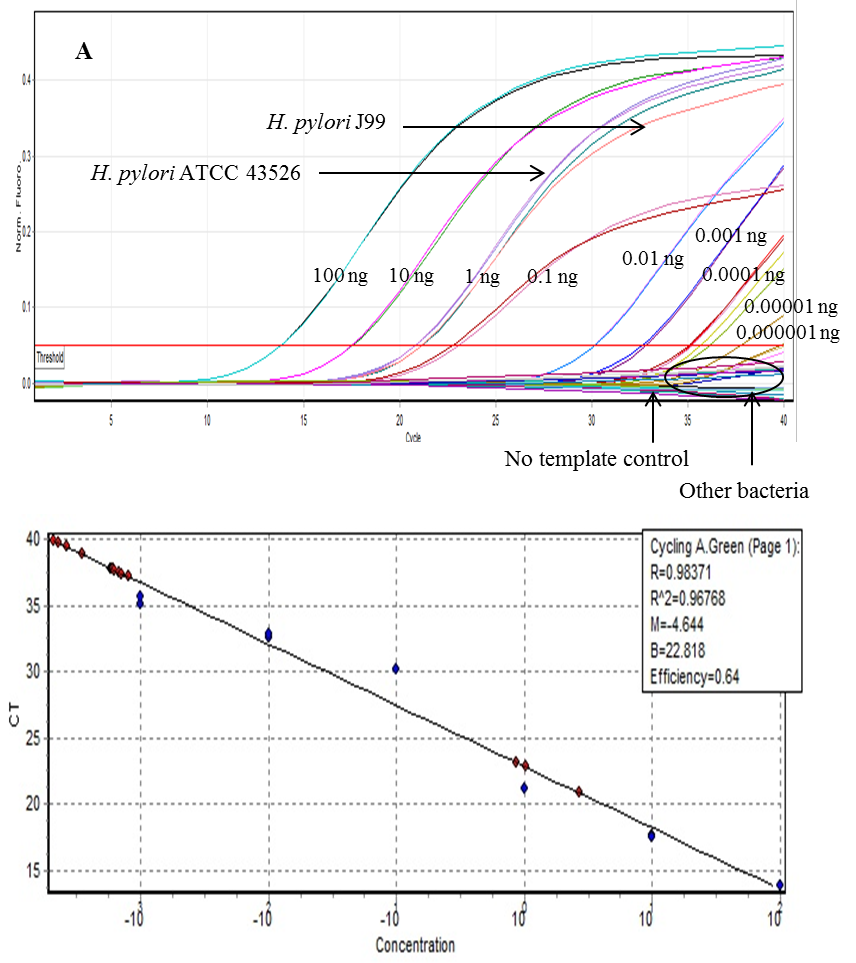


**A**


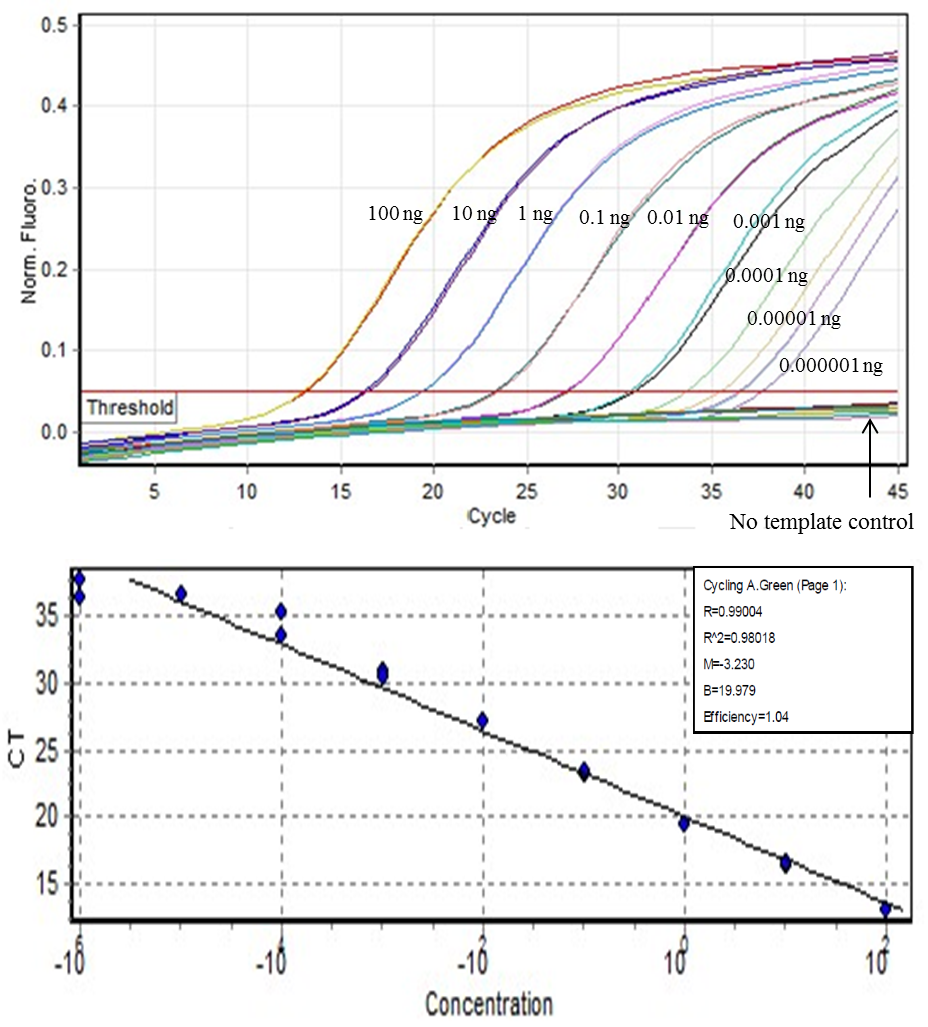


**B**

**Figure 1** (A) The specificity of *ureA* qPCR. (B) Standard curve for quantification was generated using the optimized qPCR amplification assay conditions based on DNA concentration ranging from 100 ng to 0.01 fg.

**SUPPLEMENT 2**


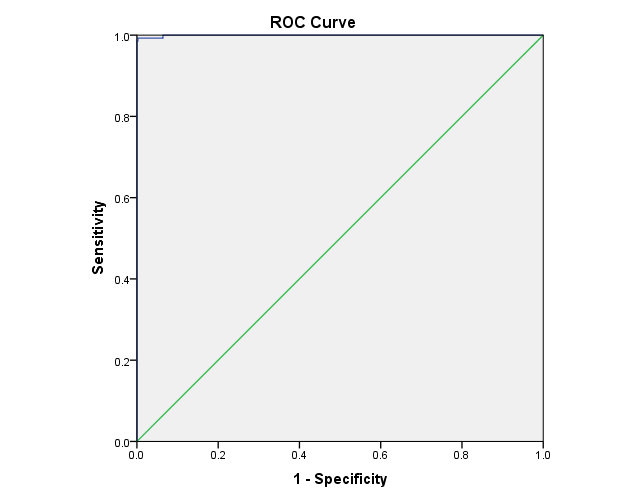


**Figure 1** Receiver operating characteristic (ROC) curve for the qPCR assay of all biopsy specimens. The area under the curve is 0.999

**SUPPLEMENT 3**

**Figure. 1**. Distribution of Cq values determined by qPCR results among the 571 biopsy samples displaying a Cq value during the 40 cycles of the assay. Black bars, biopsy specimens positive for qPCR ( 0.5 copies number per 100 human cells); gray bars, biopsy specimens negative for qPCR (0.5 copies number per 100 human cells).

**SUPPLEMENT 4**

Singleplex qPCR

Multiplex qPCR


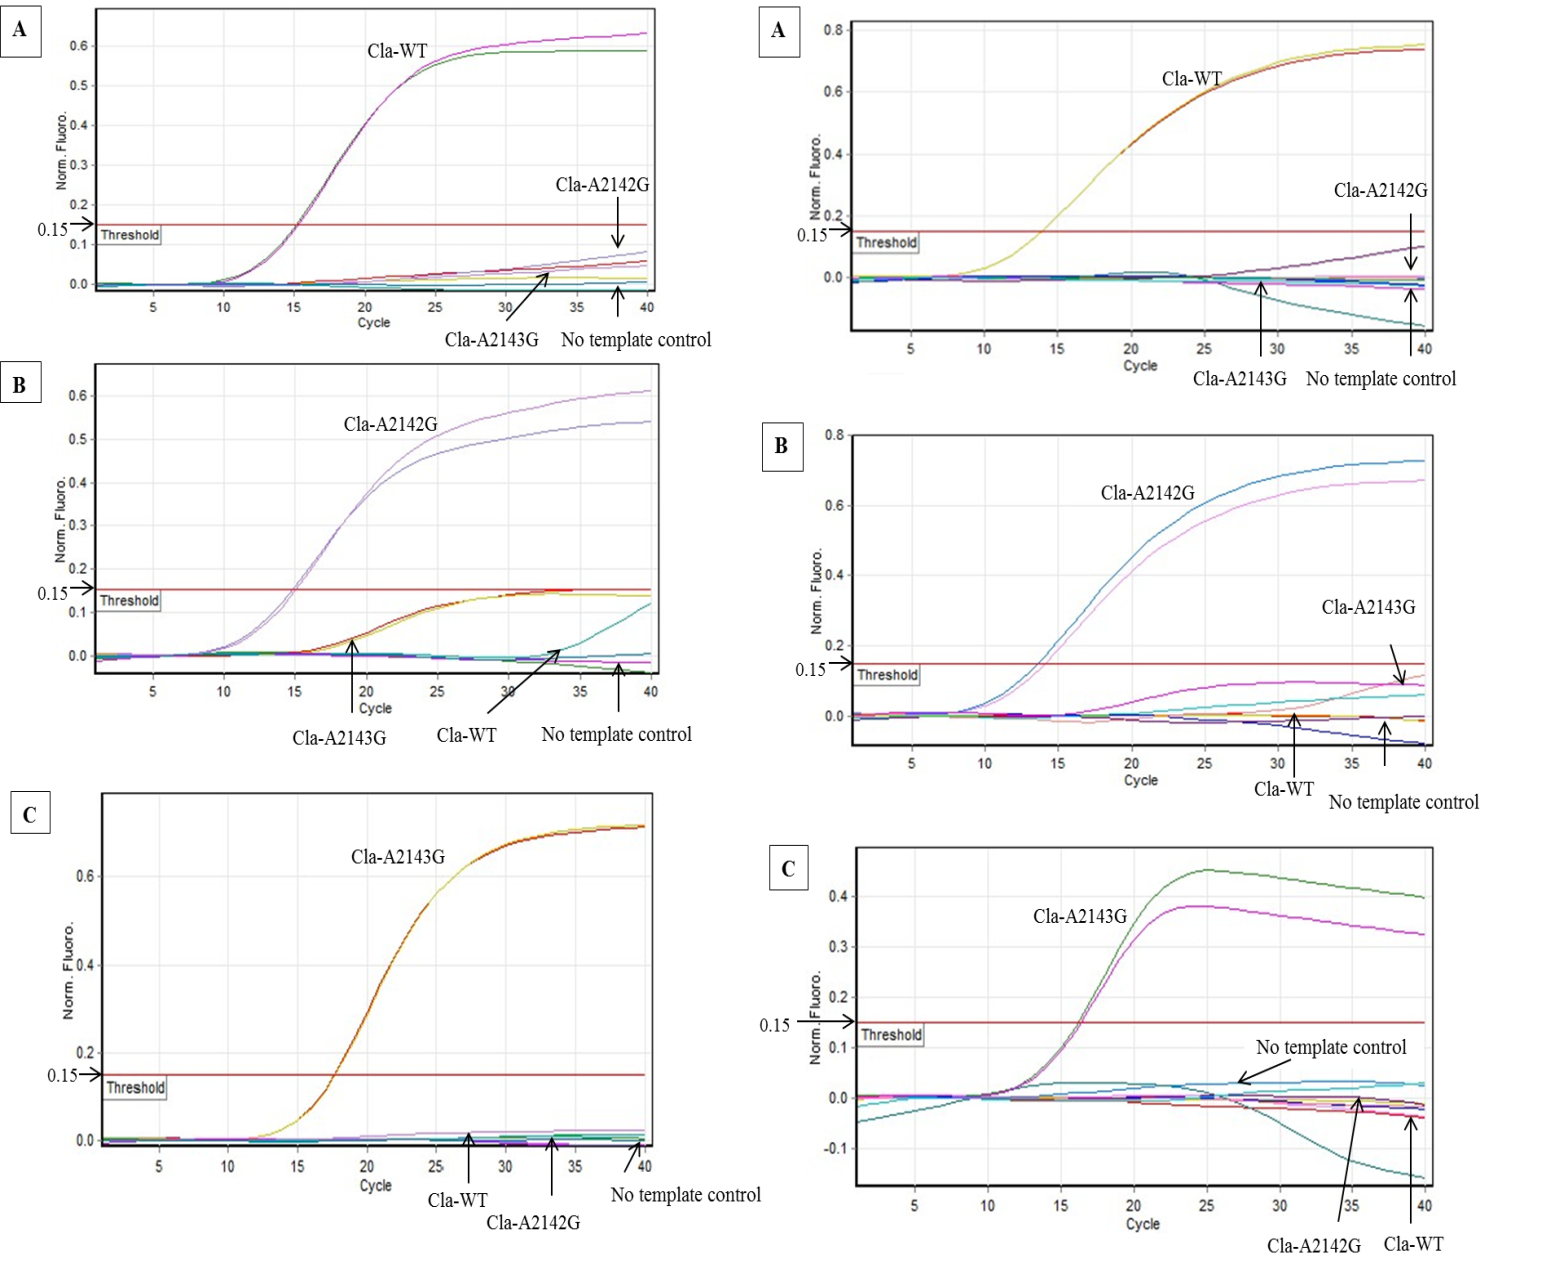


**Figure 1** Amplification curves of the singleplex qPCR and multiplex qPCR assay for detection of the wild-type, A2142G, and A2143G mutations. (A) The fluorescence signal from the Cy5 dye (Red) of the Cla-PWT. (B) The fluorescence signal from HEX dye (Yellow) of the Cla-P2142G. (C) The fluorescence signal from the FAM dye (Green) of the Cla-P2143G.

**SUPPLEMENT 5**


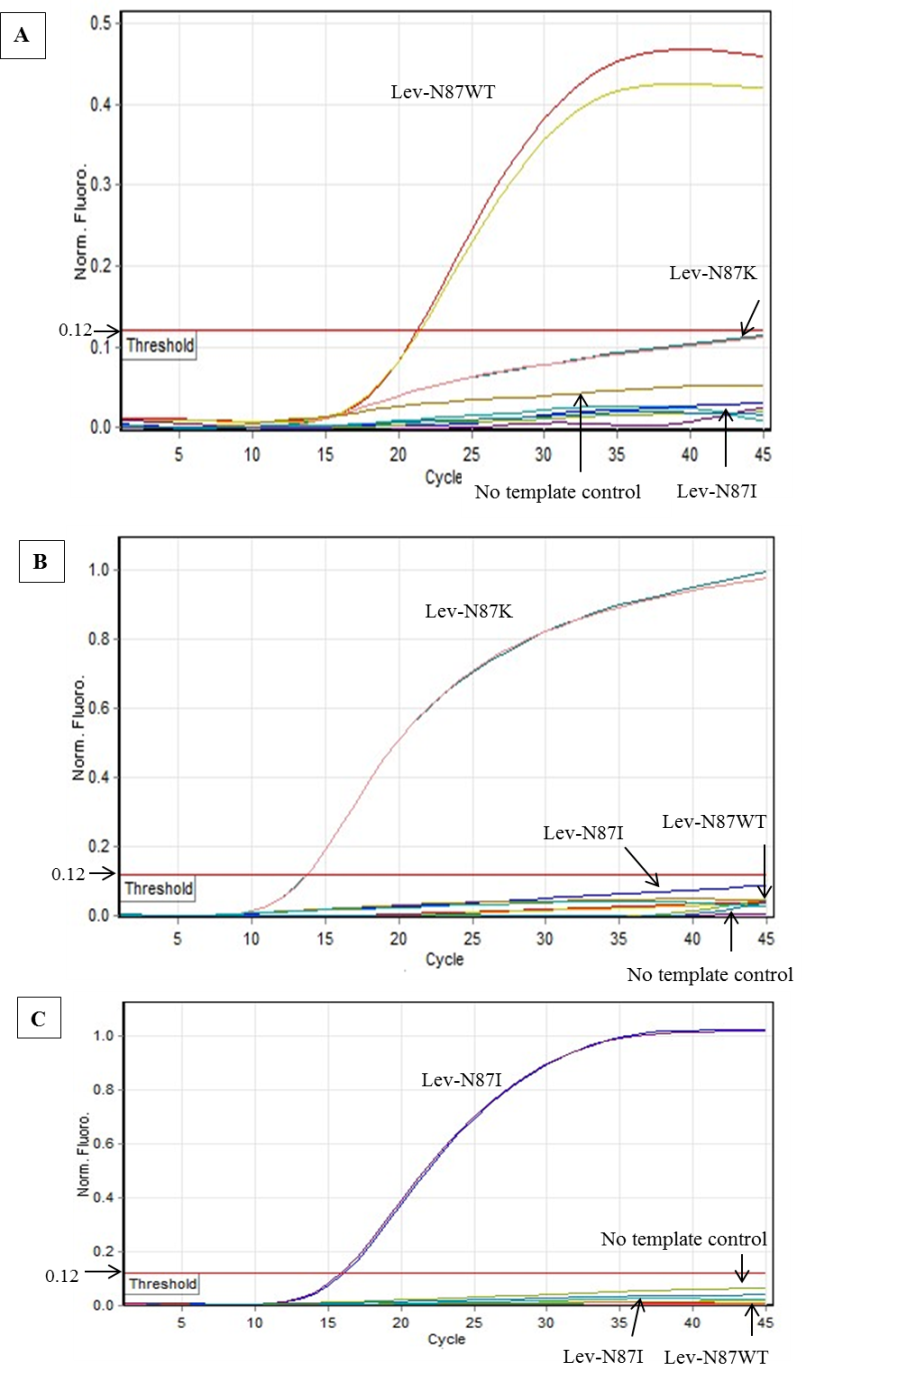

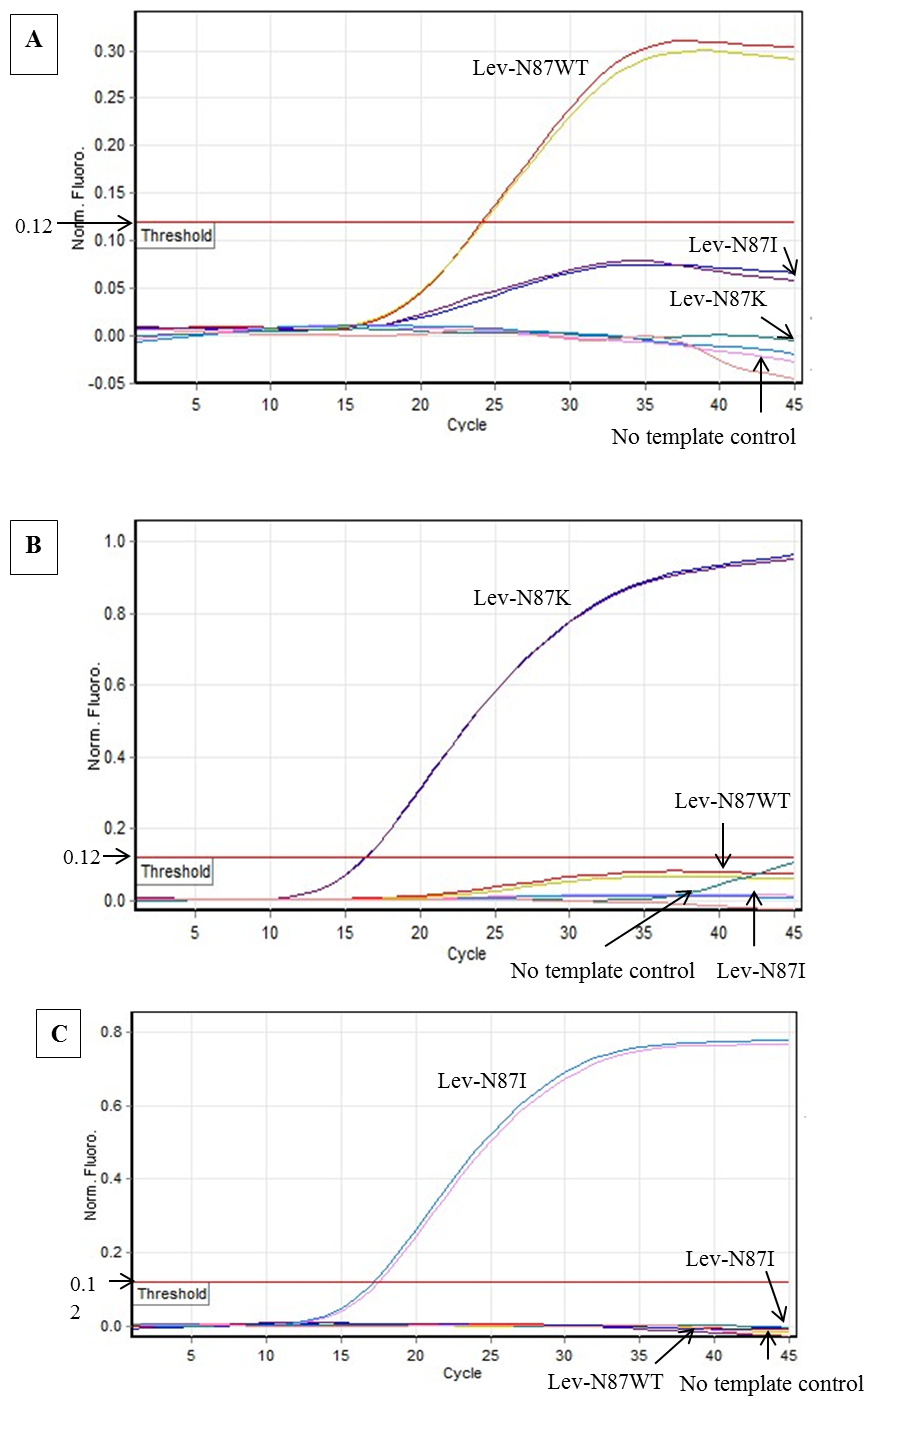


Singleplex qPCR

Multiplex qPCR

**Figure 1**. Amplification curves of the singleplex and multiplex qPCR assay for detection of Lev-N87WT, Lev-N87K, and Lev-N87I mutations. (A) The fluorescence signal from the HEX dye (Yellow) of the Lev-N87WT. (B) The fluorescence signal from the FAM dye (Green) of the Lev-N87K. (C) The fluorescence signal from Cy5 dye (Red) of the Lev-N87I.

**
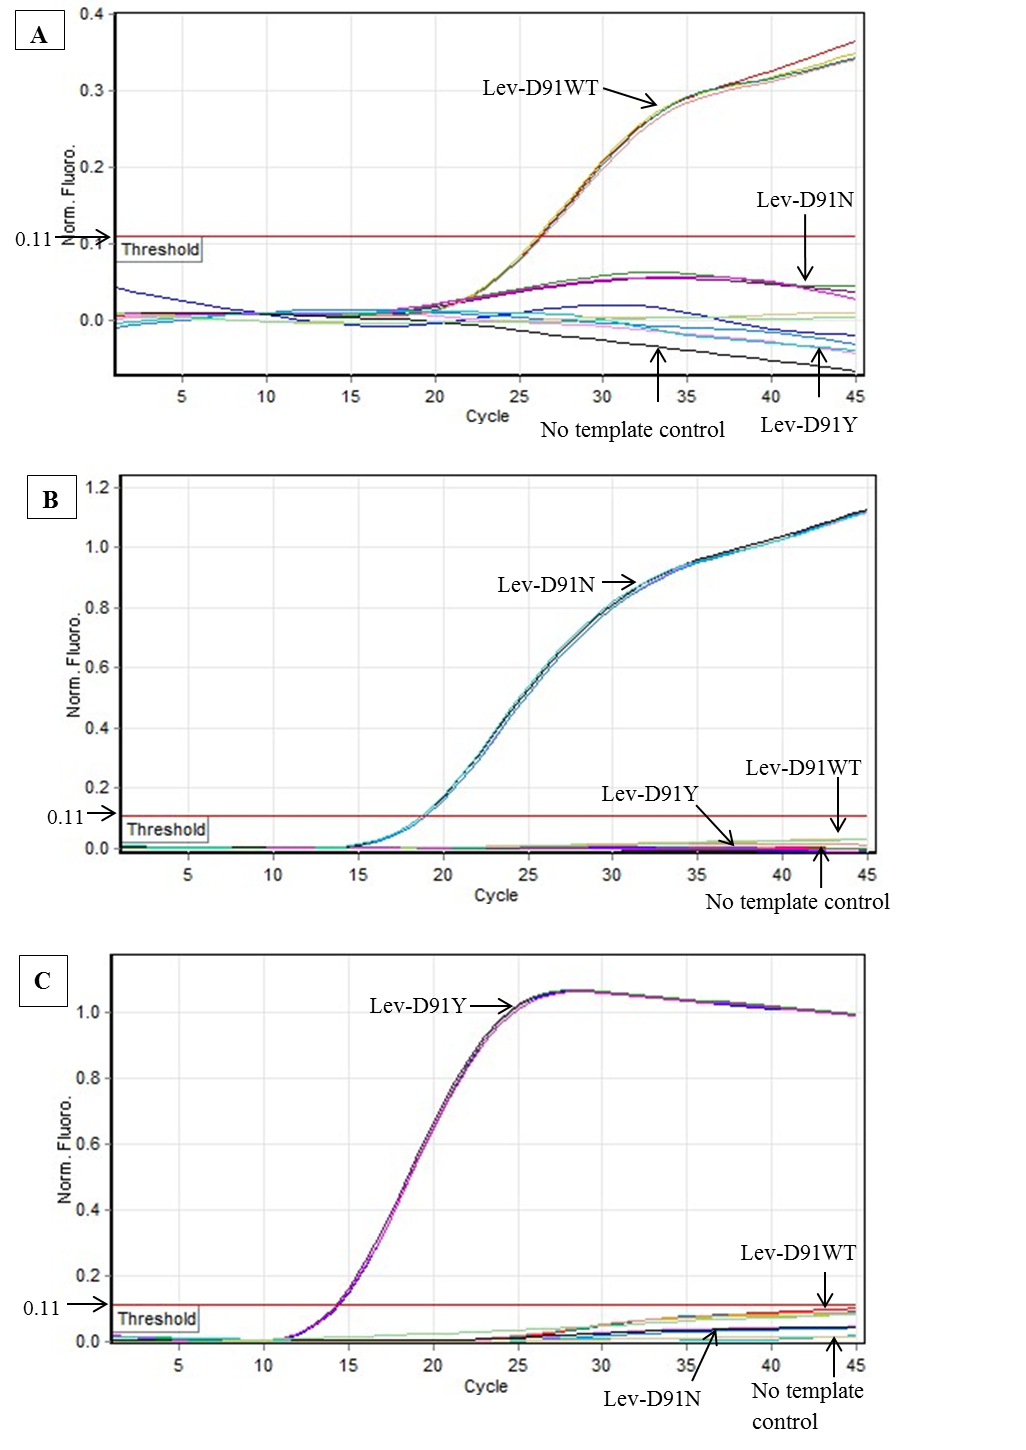

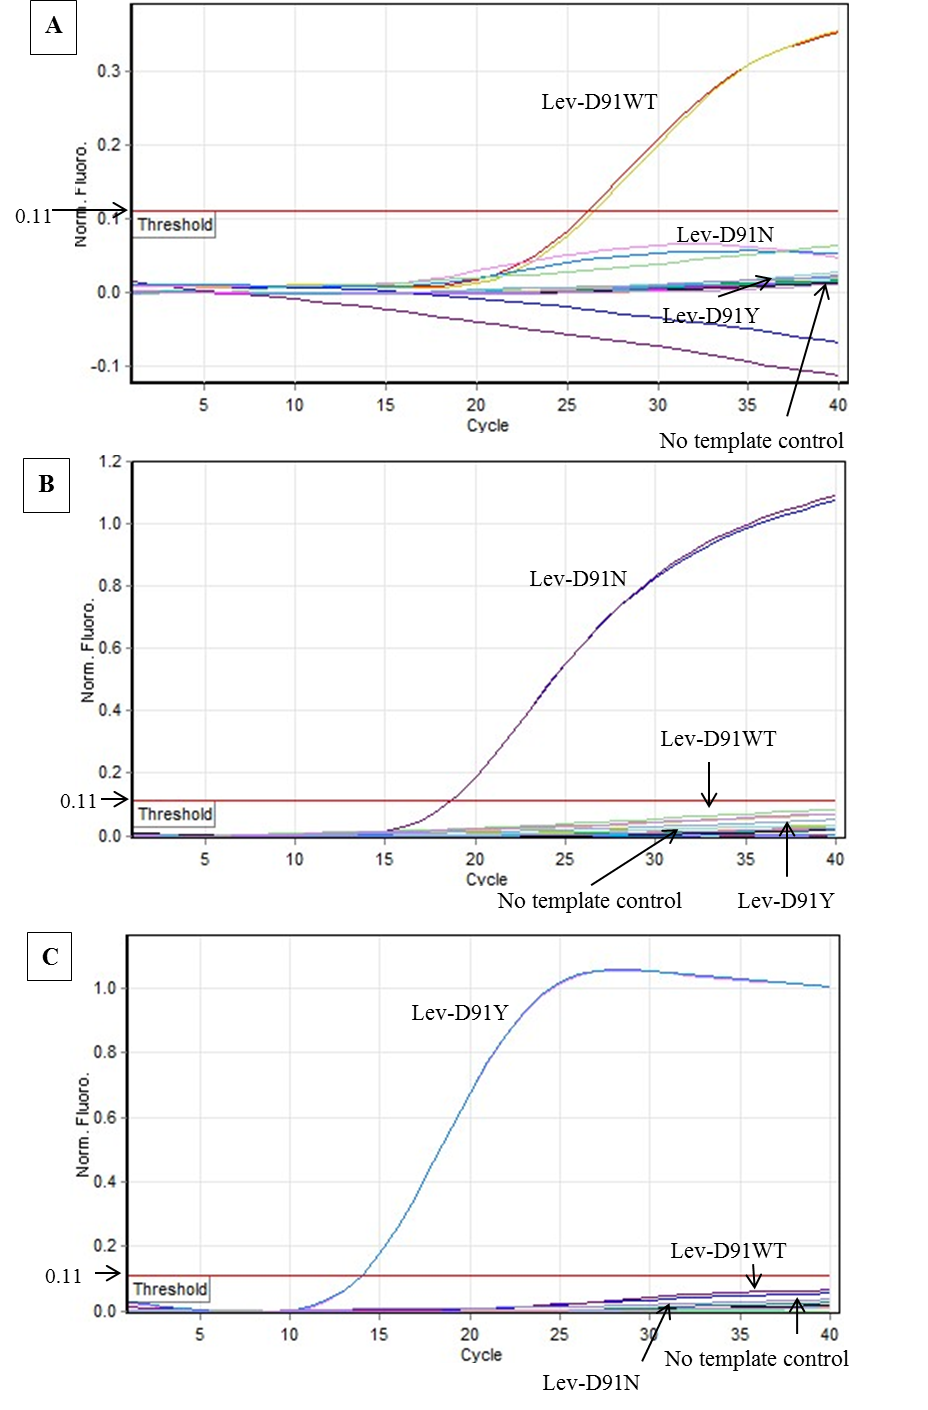
SUPPLEMENT 6**

Multiplex qPCR

Singleplex qPCR

**Figure 1.** Amplification curves of the singleplex qPCR assay for detection of Lev-D91WT, Lev-D91N, and Lev-D91Y mutations. (A) The fluorescence signal from the HEX dye (Yellow) of the Lev-D91WT. (B) The fluorescence signal from Cy5 dye (Red) of the Lev-D91N. (C) The fluorescence signal from the FAM dye (Green) of the Lev-D91Y.

**SUPPLEMENT 7**

**Table 1** Analytical sensitivity and corresponding threshold cycles (Cq) values from singleplex and multiplex qPCR assay for each target

| Probe detection for | Quantity (ng/reaction) | Cq (mean ± SDa) | | *P* valueb |
| --- | --- | --- | --- | --- |
| Singleplex | Multiplex |
| Wild-type | 10 | 16.38 ± 0.03 | 16.57 ± 0.08 | 0.920 |
|  | 1 | 18.97 ± 0.00 | 19.12 ± 0.06 |  |
|  | 0.1 | 22.18 ± 0.11 | 22.26 ± 0.02 |  |
|  | 0.01 | 22.57 ± 0.02 | 25.91 ± 0.04 |  |
| A2142G mutation | 10 | 16.28 ± 0.06 | 16.45 ± 0.007 | 0.531 |
|  | 1 | 19.84 ± 0.04 | 20.20 ± 0.28 |  |
|  | 0.1 | 23.54 ± 0.01 | 23.68 ± 0.43 |  |
|  | 0.01 | 27.45 ± 0.30 | 27.48 ± 0.07 |  |
| A2143G mutation | 10 | 18.55 ± 0.04 | 19.05 ± 0.06 | 0.747 |
|  | 1 | 21.93 ± 0.14 | 22.60 ± 0.42 |  |
|  | 0.1 | 25.28 ± 0.11 | 26.05 ± 0.10 |  |
|  | 0.01 | 28.94 ± 0.21 | 29.75 ± 0.03 |  |

a, Standard deviation; b, Independent sample *t*-test

**SUPPLEMENT 8**

**Table 1**. Analytical sensitivity and corresponding threshold cycles (Cq) values from singleplex and multiplex qPCR assay for each target

| Probe detection for | Quantity (ng/reaction) | Cq (mean ± SDab) | | *P* valueb |
| --- | --- | --- | --- | --- |
| Singleplex | Multiplex |
| N87Wild-type | 10 | 18.85 ± 0.49 | 19.12 ± 0.47 | 0.926 |
|  | 1 | 21.92 ± 0.04 | 22.15 ± 0.06 |  |
|  | 0.1 | 25.33 ± 0.07 | 25.38 ± 0.13 |  |
|  | 0.01 | 27.84 ± 0.01 | 27.98 ± 0.05 |  |
| N87K mutation | 10 | 14.76 ± 0.16 | 14.55 ± 0.23 | 0.920 |
|  | 1 | 17.85 ± 0.03 | 17.77 ± 0.08 |  |
|  | 0.1 | 21.12 ± 0.03 | 21.08 ± 0.01 |  |
|  | 0.01 | 24.40 ± 0.54 | 23.96 ± 0.15 |  |
| N87I mutation | 10 | 15.80 ± 0.02 | 15.92 ± 0.08 | 0.956 |
|  | 1 | 19.12 ± 0.11 | 19.03 ± 0.04 |  |
|  | 0.1 | 22.47 ± 0.02 | 22.65 ± 0.02 |  |
|  | 0.01 | 25.73 ± 0.07 | 25.97 ± 0.32 |  |

a, Standard deviation; b, Independent sample *t*-test

**SUPPLEMENT 9**

**Table 1.** Analytical sensitivity and corresponding threshold cycles (Cq) values from singleplex and multiplex qPCR assay for each target

| Probe detection for | Quantity (ng/reaction) | Cq (mean ± SDa) | | *P* valueb |
| --- | --- | --- | --- | --- |
| Singleplex | Multiplex |
| D91Wild-type | 10 | 22.07 ± 0.01 | 22.12 ± 0.16 | 0.943 |
|  | 1 | 25.01 ± 0.01 | 25.07 ± 0.03 |  |
|  | 0.1 | 27.14 ± 0.13 | 27.26 ± 0.37 |  |
|  | 0.01 | 30.51 ± 0.72 | 30.50 ± 0.68 |  |
| D91N mutation | 10 | 20.42 ± 0.03 | 20.33 ± 0.00 | 0.984 |
|  | 1 | 23.60 ± 0.08 | 23.67 ± 0.40 |  |
|  | 0.1 | 28.13 ± 0.17 | 28.33 ± 0.04 |  |
|  | 0.01 | 31.46 ± 0.74 | 31.46 ± 0.79 |  |
| D91Y mutation | 10 | 21.76 ± 0.25 | 21.73 ± 0.36 | 0.948 |
|  | 1 | 26.50 ± 0.61 | 26.07 ± 0.03 |  |
|  | 0.1 | 32.40 ± 0.17 | 32.31 ± 0.41 |  |
|  | 0.01 | - | - |  |

a, Standard deviation; b, Independent sample *t*-te

**SUPPLEMENT 10**


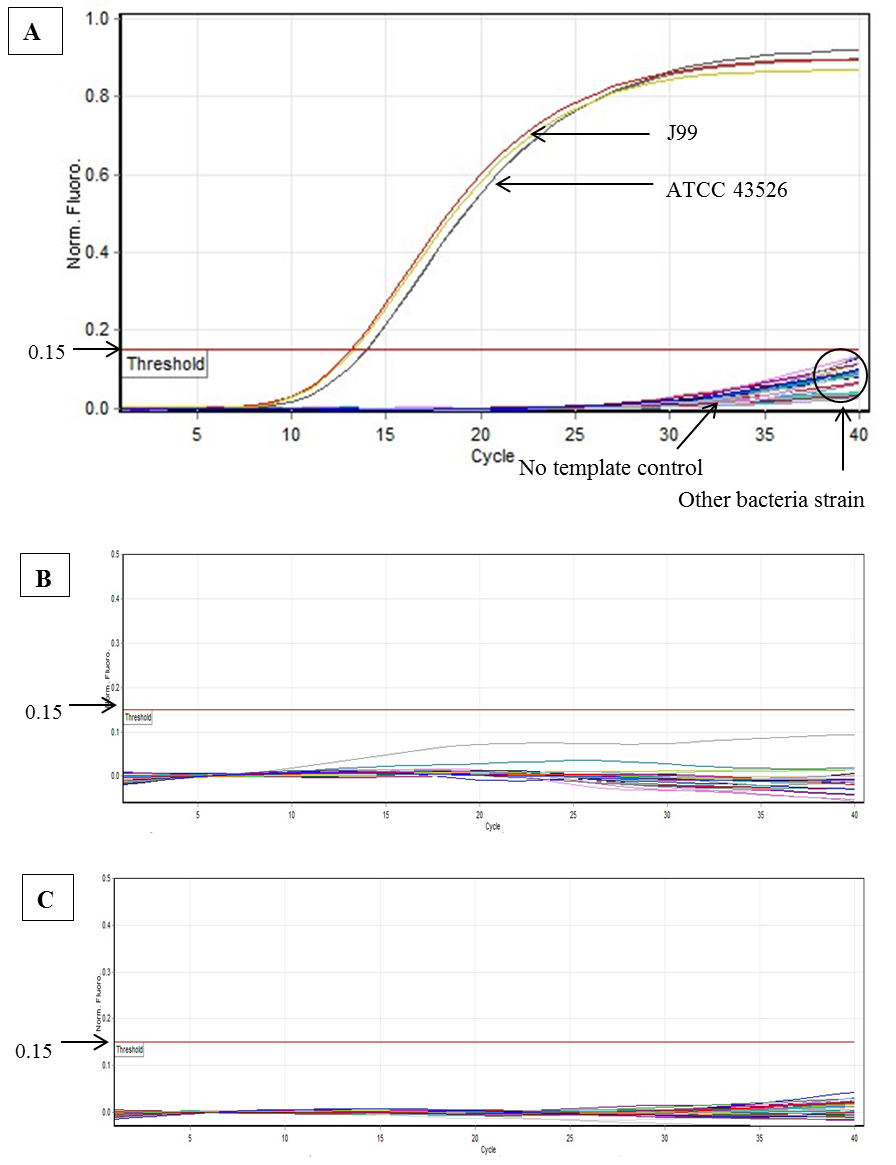

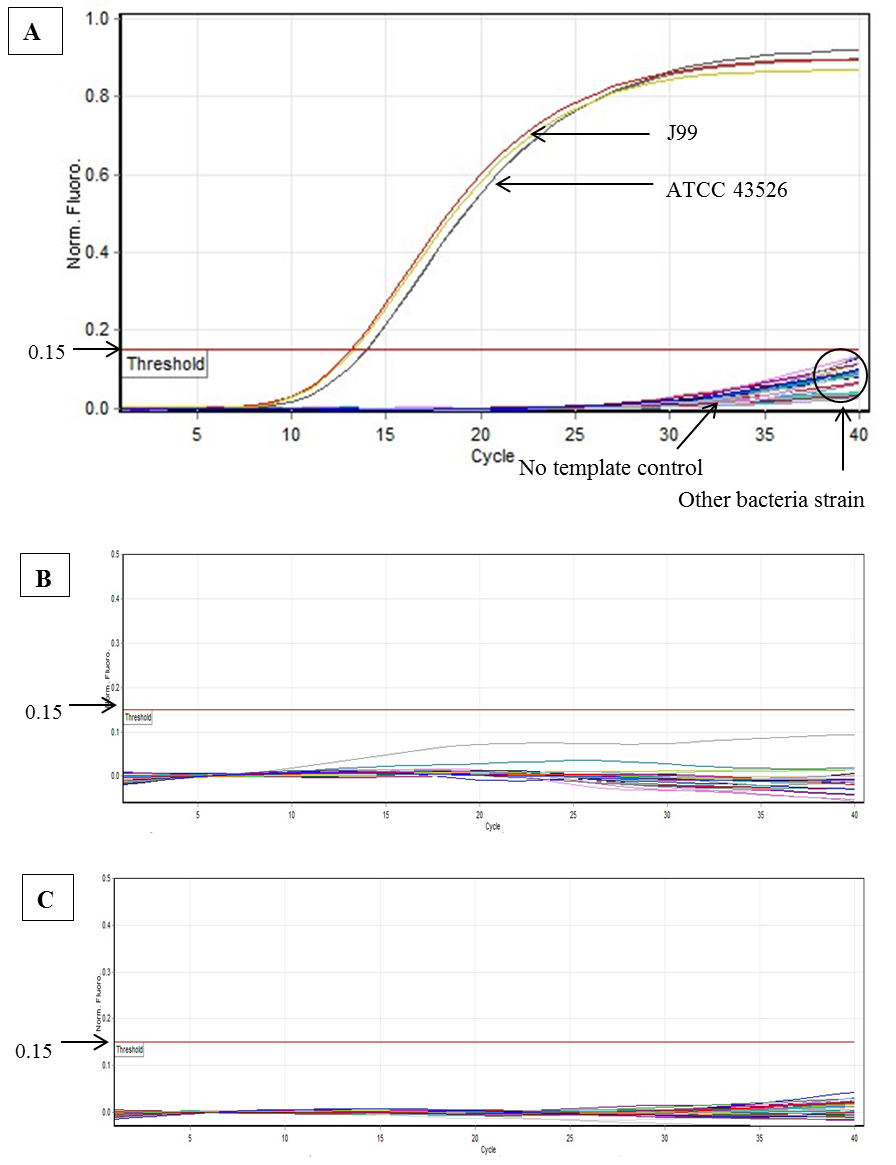

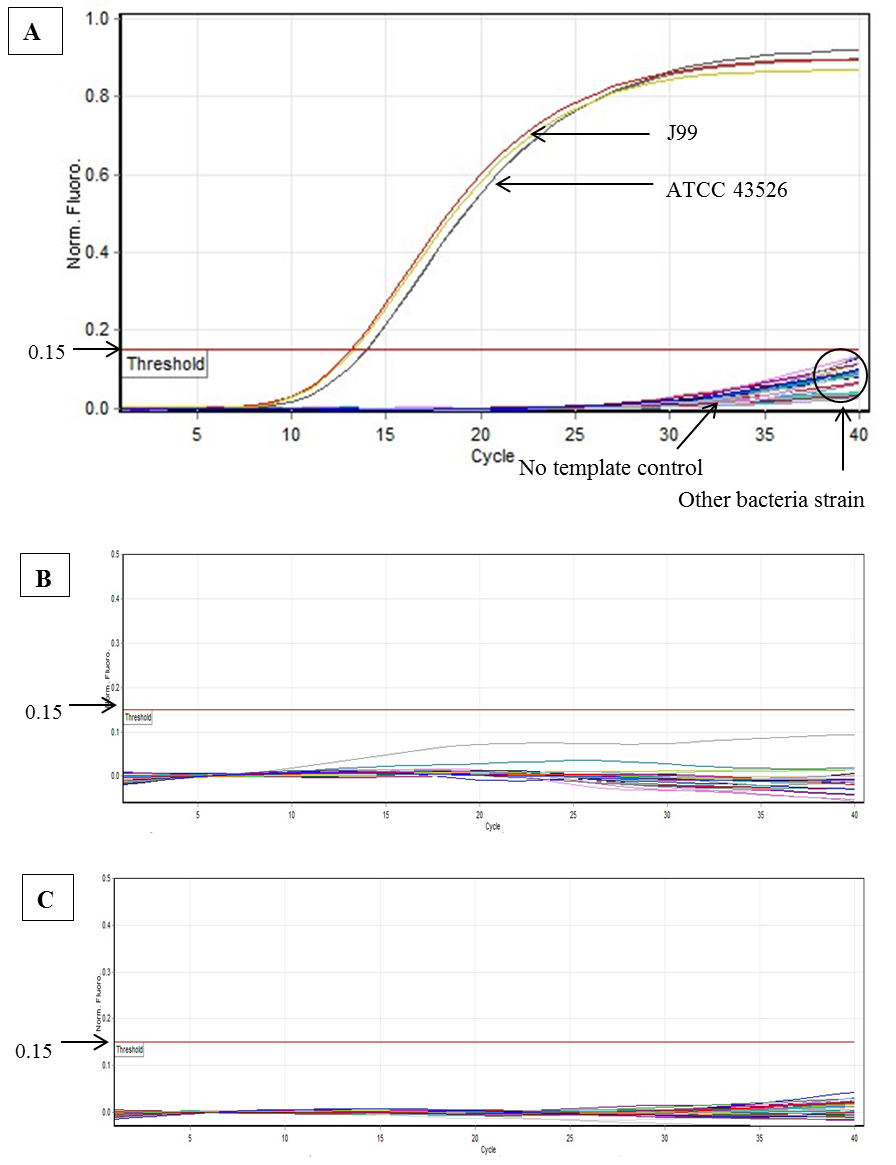


**Figure 1**. The specificity of triplex 23S rRNA qPCR. (A) The fluorescence signal was from the Cy5 dye (Red) of the Cla-PWT. (B) The fluorescence signal was from HEX dye (Yellow) of the Cla-P2142G. (C) The fluorescence signal was from the FAM dye (Green) of the Cla-P2143G.

**SUPPLEMENT 11**


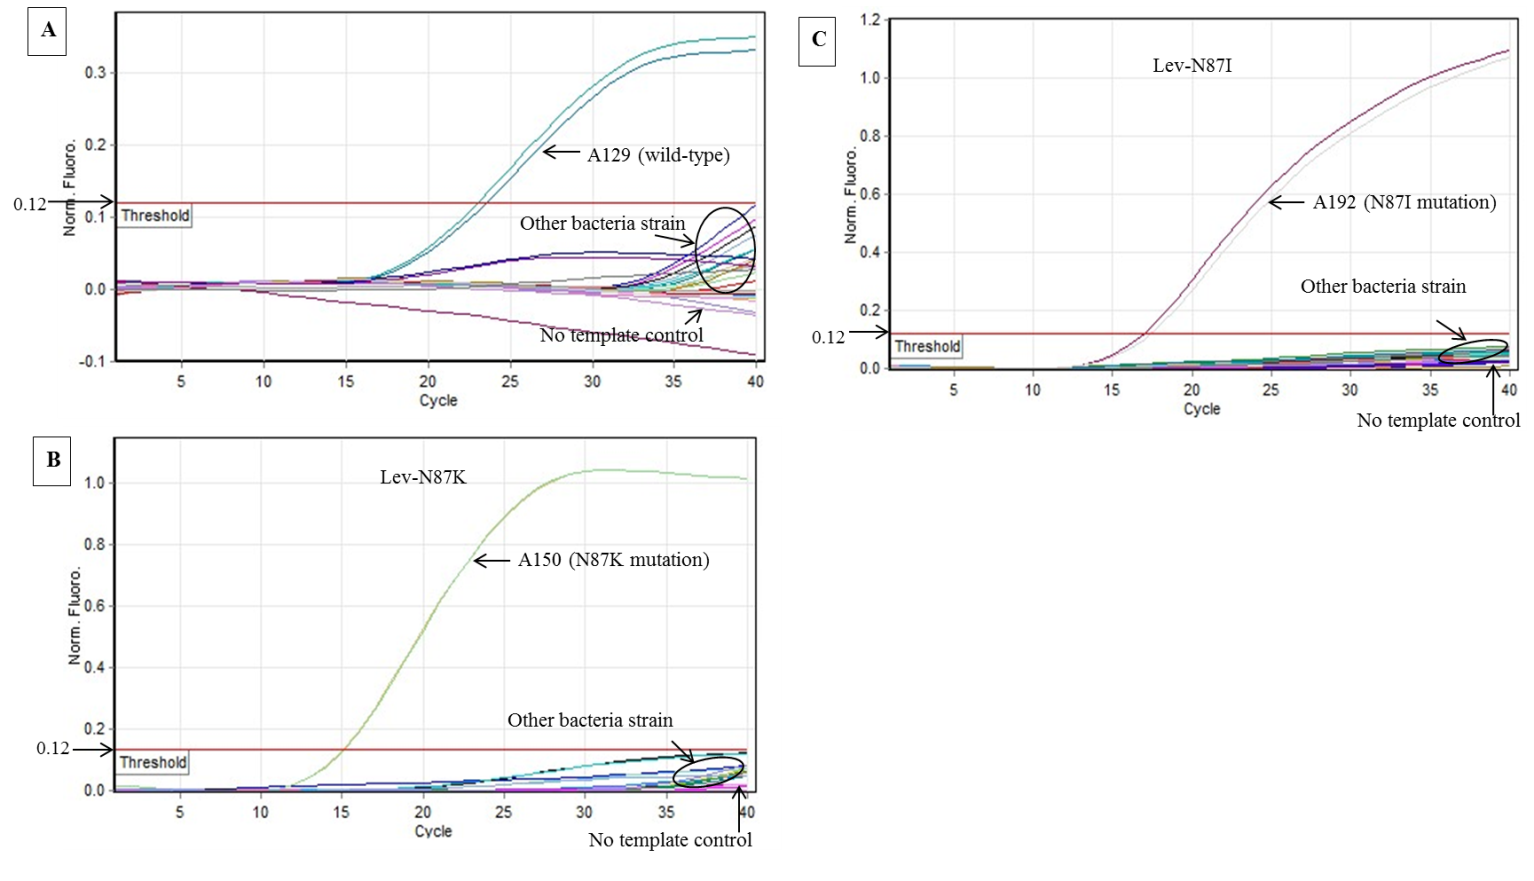

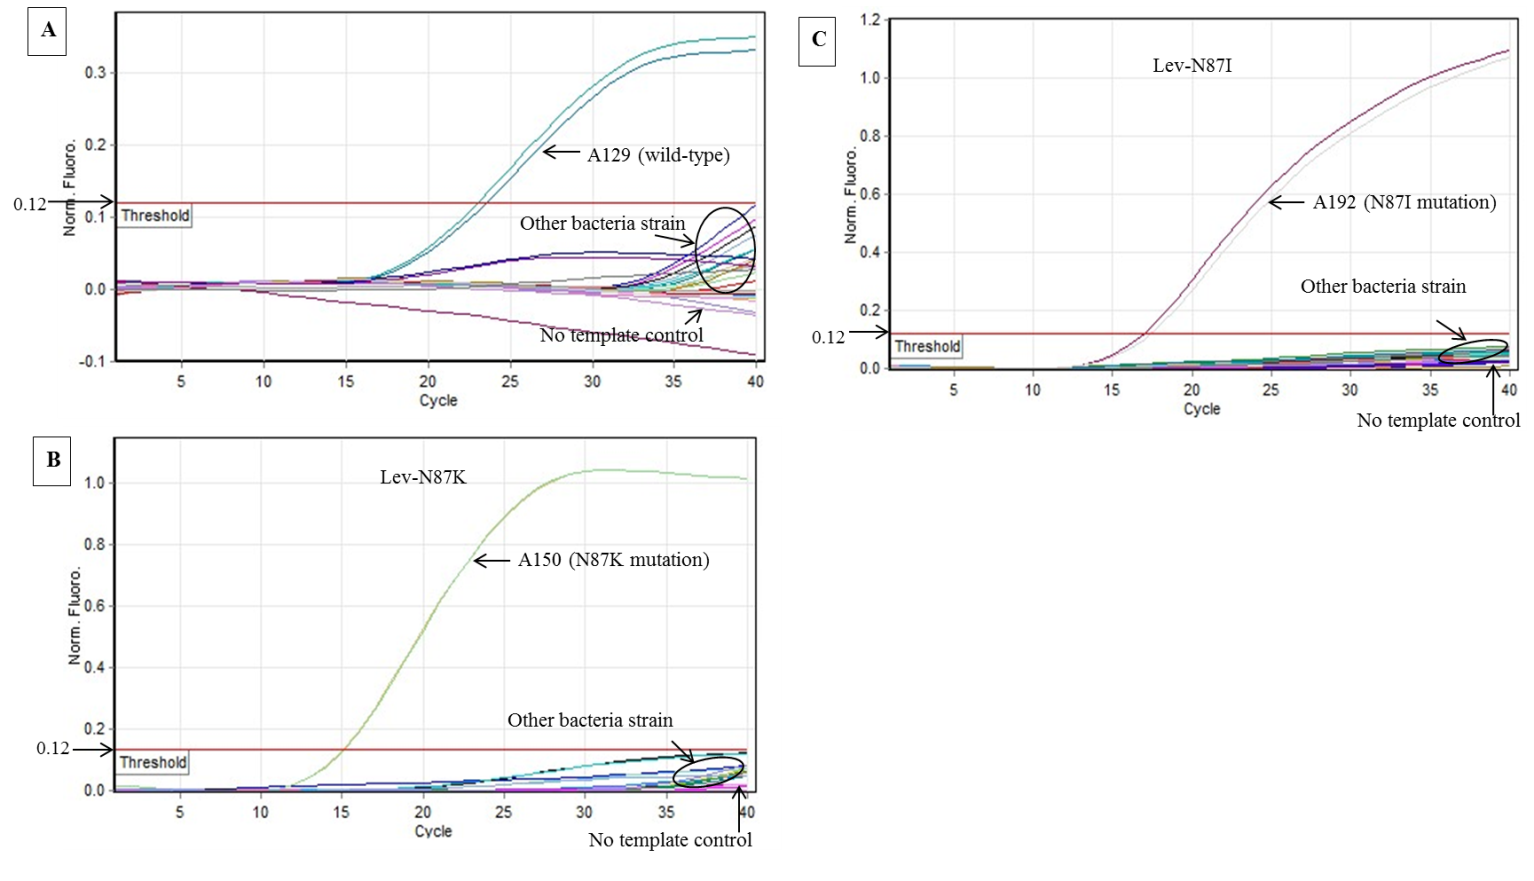

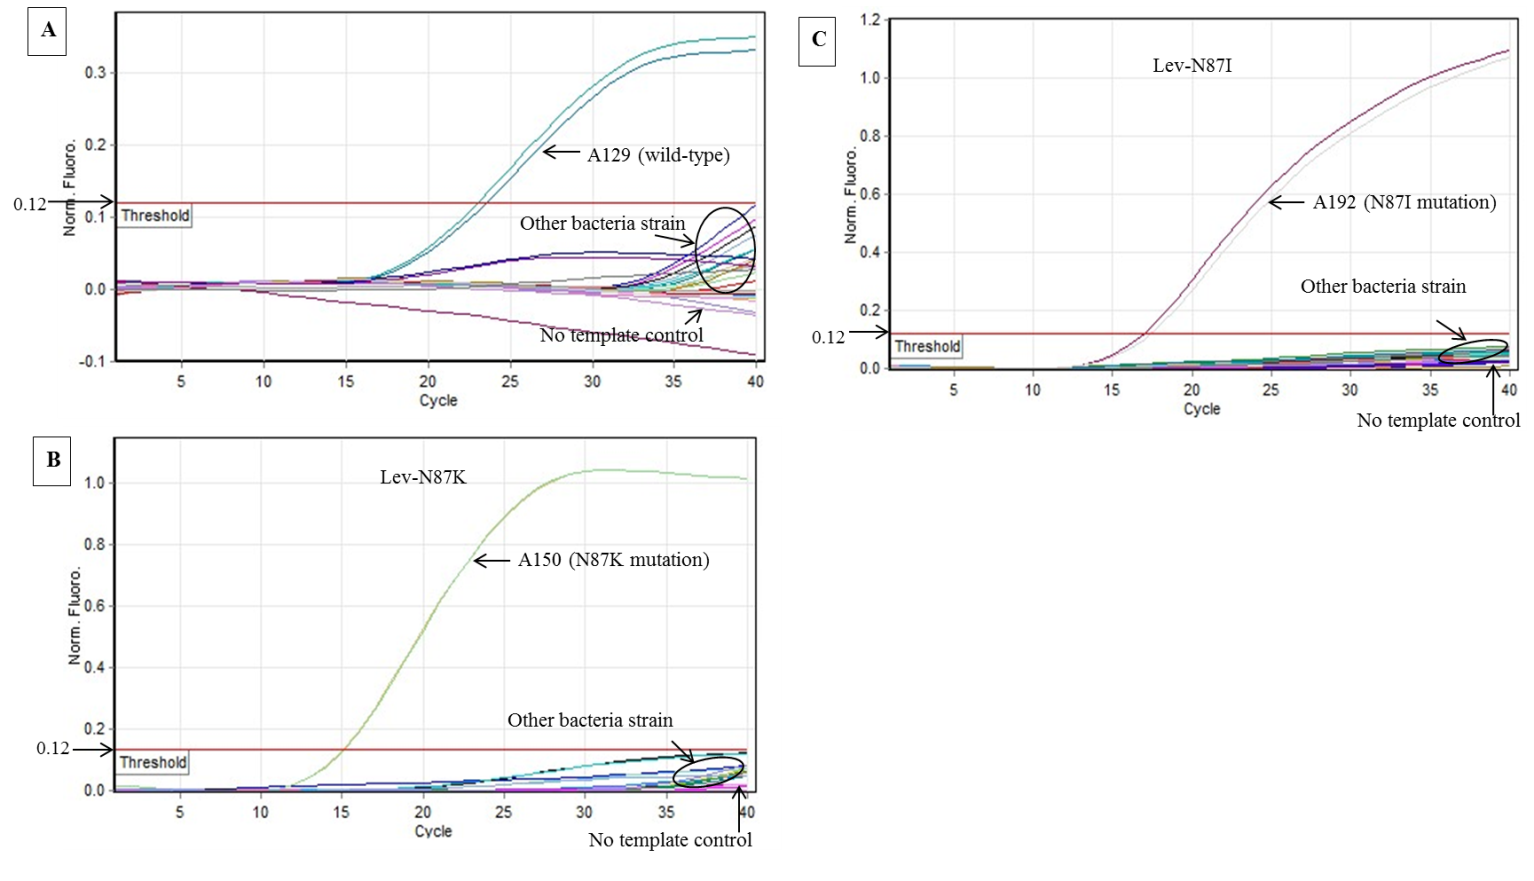


**Figure 1**. The specificity of triplex *gyrA*-N87 qPCR. (A) The fluorescence signal from the HEX dye (Yellow) of the Lev-N87WT. (B) The fluorescence signal from the FAM dye (Green) of the Lev-N87K. (C) The fluorescence signal from Cy5 dye (Red) of the Lev-N87I.

**SUPPLEMENT 12**


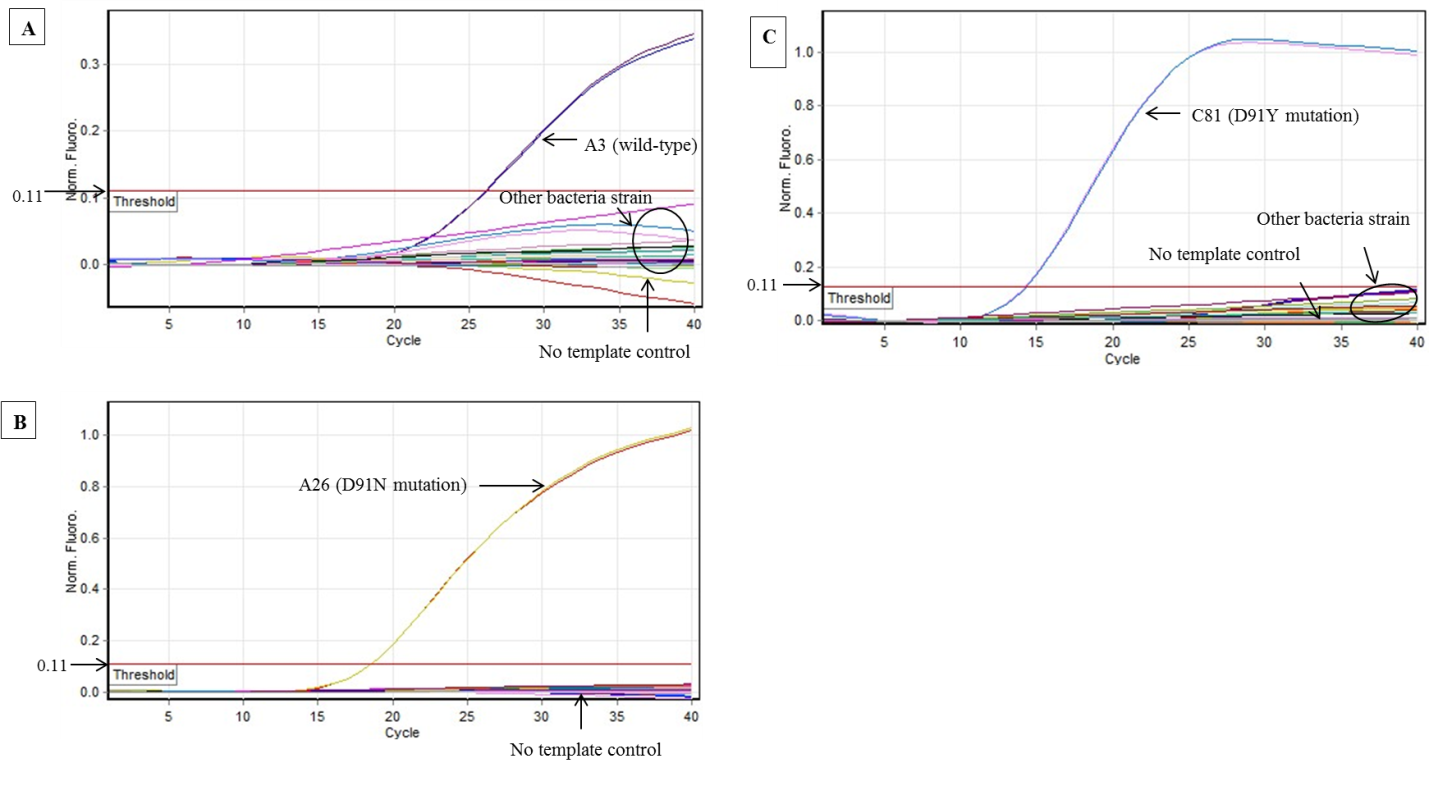

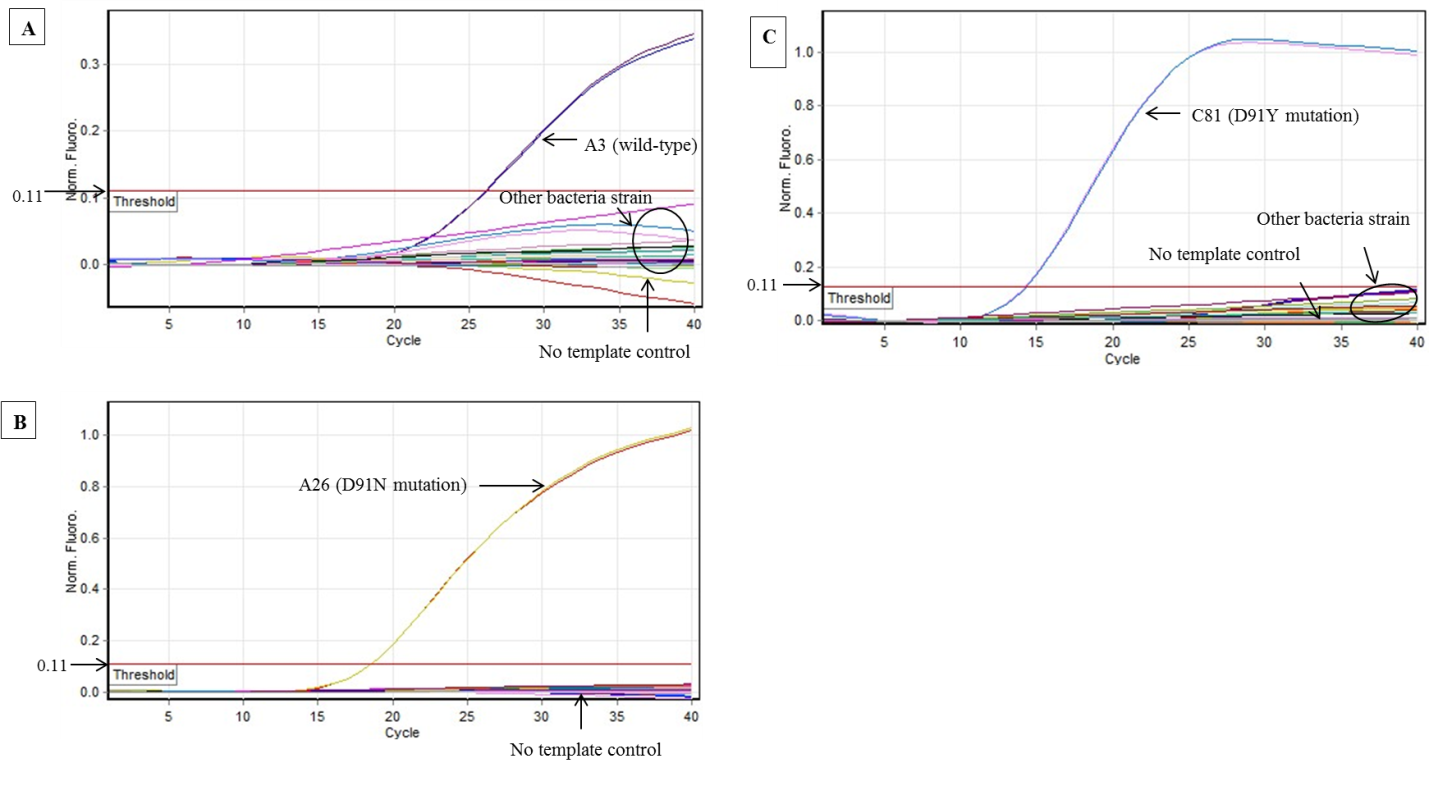

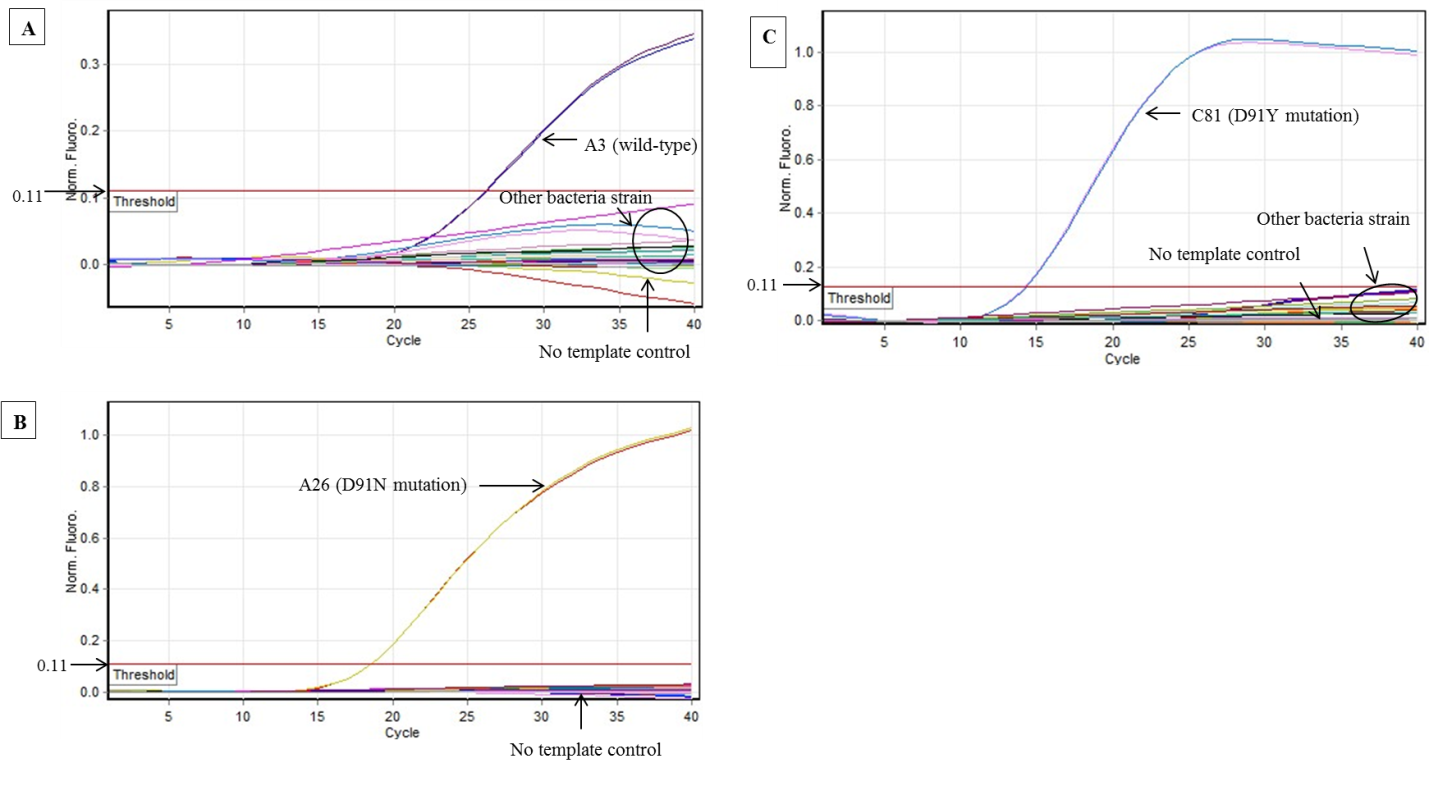


**Figure 1.** The specificity of triplex *gyrA*-D91 qPCR. (A) The fluorescence signal from the HEX dye (Yellow) of the Lev-D91WT. (B) The fluorescence signal from Cy5 dye (Red) of the Lev-D91N. (C) The fluorescence signal from the FAM dye (Green) of the Lev-D91Y.
